# Supplementary material
Source: publisher site journal article supplement (https://www.dovepress.com/article/297707)
Supplement: Supplementary file 1 [file get_supplementary_file.php]

**Supplementary Table 1. Correlations between 24-hour urinary norepinephrine and sleep parameters**

| **Sleep parameters** | **Normal weight** | **Overweight/obesity** |
| --- | --- | --- |
| Sleep onset latency (min) | 0.242 (0.205) | -0.088 (0.419) |
| Total sleep time (min) | 0.033 (0.865) | 0.069 (0.527) |
| Sleep efficiency (%) | -0.100 (0.605) | -0.005 (0.967) |
| NREM sleep stage 1 (%) | -0.029 (0.882) | 0.007 (0.950) |
| NREM sleep stage 2 (%) | -0.092 (0.635) | -0.061 (0.575) |
| NREM sleep stage 3 (%) | -0.027 (0.891) | -0.070 (0.520) |
| REM sleep (%) | 0.340 (0.071) | 0.242 (0.025) |
| Wake time after sleep onset (min) | 0.118 (0.541) | 0.050 (0.649) |
| AHI (event/hour) | -0.029 (0.883) | 0.168 (0.123) |
| Minimum SaO2 (%) | -0.076 (0.694) | -0.211 (0.051) |

Notes: Data were presented as correlation coefficient (p-value).

AHI, apnea hypopnea index; NREM, non-rapid eye movement; REM, rapid eye movement; SaO2, oxygen saturation. Overweight/obesity was defined as a body mass index≥25 kg/m2.
